# Supplementary material for: A structured approach to native mitral valve infective endocarditis: Is repair better than replacement?
Source: PubMed Central journal article supplement — Eur J Cardiothorac Surg. 2020 Apr 24;58(3):544–50. doi: 10.1093/ejcts/ezaa079 (PMC7453034; doi:10.1093/ejcts/ezaa079), 2020-04-24
Supplement: ezaa079_supplementary_data.pdf [file ezaa079_supplementary_data.pdf]

**Supplementary Table 1.** Intraoperative details.

| Mitral valve replacement (n= 52)     |           |
|--------------------------------------|-----------|
| Prosthetic valve types               |           |
| Medtronic Mosaic <sup>a</sup>        | 20 (38.5) |
| Perimount Magna <sup>b</sup>         | 10 (19.2) |
| St. Jude Medical Regent <sup>c</sup> | 22 (42.3) |
| Prosthesis size (mm)                 |           |
| 27                                   | 6 (11.5)  |
| 29                                   | 21 (40.4) |
| 31                                   | 16 (30.8) |
| 33                                   | 9 (17.3)  |
| Mitral valve repair (n=97)           |           |
| Prosthetic ring annuloplasty         | 86 (88.7) |
| Carbomedics Annuloflex <sup>d</sup>  | 1 (1.2)   |
| Medtronic CG Future <sup>a</sup>     | 1 (1.2)   |
| Memo 3D <sup>e</sup>                 | 4 (4.6)   |
| Physio <sup>b</sup>                  | 80 (93.0) |

<sup>a</sup>Medtronic, Minneapolis, MN, USA; <sup>b</sup>Edwards Lifesciences, Irvine, CA, USA; <sup>c</sup>St. Jude Medical, Little Canada, MN, USA; <sup>d</sup>Carbomedics, Austin, TX, USA; <sup>e</sup>LivaNova Group, Milan, Italy.

Supplementary Table 2.

Results of the univariable Cox regression analyses.

|                                        | All time mortality |              |         | Mortality within 1 year after surgery (pre-landmark) |              |         | Mortality beyond 1 year after surgery (post-landmark) |                           |         |
|----------------------------------------|--------------------|--------------|---------|------------------------------------------------------|--------------|---------|-------------------------------------------------------|---------------------------|---------|
|                                        | HR                 | 95% CI       | P-value | HR                                                   | 95% CI       | P-value | HR                                                    | 95% CI                    | P-value |
| MV replacement                         | 1.730              | 0.986-3.034  | 0.056   | 1.354                                                | 0.647-2.835  | 0.422   | 2.441                                                 | 1.033-5.766               | 0.042   |
| Age (years)                            | 1.047              | 1.021-1.074  | 0.000   | 1.042                                                | 1.007-1.077  | 0.018   | 1.054                                                 | 1.014-1.096               | 0.008   |
| Gender (female)                        | 0.906              | 0.483-1.697  | 0.757   | 0.826                                                | 0.353-1.934  | 0.660   | 1.017                                                 | 0.400-2.584               | 0.972   |
| Renal impairment                       |                    |              |         |                                                      |              |         |                                                       |                           |         |
| CC <50 mmol/min                        | 2.141              | 1.171-3.913  | 0.013   | 1.947                                                | 0.843-4.499  | 0.119   | 2.380                                                 | 0.997-5.678               | 0.051   |
| Dialysis                               | 5.202              | 2.143-12.631 | 0.000   | 6.475                                                | 2.297-18.252 | 0.000   | 2.365                                                 | 0.295-18.969              | 0.418   |
| Hypertension                           | 1.097              | 0.628-1.919  | 0.745   | 1.079                                                | 0.509-2.284  | 0.843   | 1.121                                                 | 0.485-2.595               | 0.789   |
| Chronic lung disease                   | 2.468              | 1.200-5.074  | 0.014   | 2.208                                                | 0.842-5.789  | 0.107   | 2.876                                                 | 0.973-8.505               | 0.056   |
| Diabetes mellitus                      | 1.428              | 0.698-2.934  | 0.332   | 1.277                                                | 0.487-3.347  | 0.619   | 1.665                                                 | 0.565-4.905               | 0.355   |
| Symptomatic MR                         | 1.646              | 0.948-2.858  | 0.077   | 1.440                                                | 0.688-3.015  | 0.334   | 1.954                                                 | 0.854-4.470               | 0.113   |
| Atrial fibrillation                    | 1.758              | 0.871-3.547  | 0.115   | 1.930                                                | 0.824-4.519  | 0.130   | 1.460                                                 | 0.418-5.102               | 0.553   |
| Impaired LV function                   | 1.653              | 0.877-3.116  | 0.120   | 2.472                                                | 1.167-5.239  | 0.018   | 0.623                                                 | 0.145-2.667               | 0.525   |
| Previous cardiac surgery               | 2.543              | 1.402-4.613  | 0.002   | 2.472                                                | 1.148-5.322  | 0.021   | 2.655                                                 | 1.035-6.812               | 0.042   |
| Peripheral embolism                    | 0.934              | 0.498-1.752  | 0.832   | 1.253                                                | 0.570-2.751  | 0.575   | 0.594                                                 | 0.201-1.750               | 0.344   |
| <i>Staphylococcus Aureus</i> infection | 1.501              | 0.769-2.930  | 0.234   | 1.591                                                | 0.679-3.725  | 0.285   | 1.371                                                 | 0.463-4.065               | 0.569   |
| Underlying MV disease                  | 0.821              | 0.455-1.481  | 0.513   | 0.831                                                | 0.378-1.825  | 0.644   | 0.809                                                 | 0.332-1.971               | 0.641   |
| Aortic valve surgery                   | 1.538              | 0.889-2.660  | 0.124   | 1.528                                                | 0.735-3.178  | 0.256   | 1.550                                                 | 0.679-3.539               | 0.298   |
| Tricuspid valve surgery                | 1.521              | 0.792-2.918  | 0.208   | 1.615                                                | 0.715-3.648  | 0.249   | 1.370                                                 | 0.459-4.093               | 0.573   |
| CABG                                   | 2.258              | 1.046-4.873  | 0.038   | 1.904                                                | 0.726-4.993  | 0.190   | 3.208                                                 | 0.893-11.526              | 0.074   |
| Annulus infection                      | 2.332              | 1.164-4.675  | 0.017   | 2.468                                                | 1.053-5.783  | 0.038   | 2.091                                                 | 0.619-7.068               | 0.235   |
| Urgent surgery                         | 1.907              | 0.859-4.236  | 0.113   | 1.974                                                | 0.686-5.677  | 0.207   | 1.825                                                 | 0.540-6.166               | 0.333   |
| Preoperative AV block de novo          | 5.335              | 2.085-13.649 | <0.001  | 7.540                                                | 2.847-19.967 | 0.000   | 0.048                                                 | 0.000-2.1×10 <sup>6</sup> | 0.736   |

Abbreviations: AV: atrioventricular; CABG: coronary artery bypass grafting; CI: confidence interval; CPB: cardiopulmonary bypass; HR: hazard ratio; LV: left ventricle; MV: mitral valve; MR: mitral regurgitation.

Supplementary Table 3.

Results of the multivariable Cox regression analyses.

|                                        | All time mortality |              |         | Mortality within 1 year after surgery (pre-landmark) |              |         | Mortality beyond 1 year after surgery (post-landmark) |              |         |
|----------------------------------------|--------------------|--------------|---------|------------------------------------------------------|--------------|---------|-------------------------------------------------------|--------------|---------|
|                                        | HR                 | 95% CI       | P-value | HR                                                   | 95% CI       | P-value | HR                                                    | 95% CI       | P-value |
| MV replacement                         | 1.430              | 0.760-2.690  | 0.267   | 1.134                                                | 0.506-2.540  | 0.760   | 2.534                                                 | 1.002-6.406  | 0.049   |
| Age (years)                            | 1.046              | 1.012-1.081  | 0.008   | 1.041                                                | 0.997-1.087  | 0.065   | 1.041                                                 | 1.000-1.084  | 0.052   |
| Gender (female)                        |                    |              |         |                                                      |              |         |                                                       |              |         |
| Renal impairment                       |                    |              | 0.020   |                                                      |              | 0.005   |                                                       |              |         |
| CC <50 mmol/min                        | 1.064              | 0.513-2.206  | 0.868   | 1.069                                                | 0.402-2.844  | 0.894   |                                                       |              |         |
| Dialysis                               | 3.950              | 1.484-10.512 | 0.006   | 5.666                                                | 1.861-17.253 | 0.002   |                                                       |              |         |
| Hypertension                           |                    |              |         |                                                      |              |         |                                                       |              |         |
| Chronic lung disease                   | 2.923              | 1.345-6.351  | 0.007   | 2.568                                                | 0.945-6.974  | 0.064   | 2.477                                                 | 0.777-7.894  | 0.125   |
| Diabetes mellitus                      |                    |              |         |                                                      |              |         |                                                       |              |         |
| Symptomatic MR                         | 1.769              | 0.992-3.154  | 0.053   |                                                      |              |         | 1.875                                                 | 0.792-4.434  | 0.153   |
| Atrial fibrillation                    |                    |              |         |                                                      |              |         |                                                       |              |         |
| Impaired LV function                   | 1.745              | 0.887-3.430  | 0.107   | 2.475                                                | 1.094-5.599  | 0.030   |                                                       |              |         |
| Previous cardiac surgery               |                    |              |         |                                                      |              |         | 2.401                                                 | 0.875-6.589  | 0.089   |
| Peripheral embolism                    |                    |              |         |                                                      |              |         |                                                       |              |         |
| <i>Staphylococcus Aureus</i> infection |                    |              |         |                                                      |              |         |                                                       |              |         |
| Underlying MV disease                  |                    |              |         |                                                      |              |         |                                                       |              |         |
| Aortic valve surgery                   |                    |              |         |                                                      |              |         |                                                       |              |         |
| Tricuspid valve surgery                |                    |              |         |                                                      |              |         |                                                       |              |         |
| CABG                                   | 2.192              | 0.960-5.003  | 0.062   |                                                      |              |         | 3.449                                                 | 0.920-12.919 | 0.066   |
| Annulus infection                      | 2.016              | 0.915-4.845  | 0.080   |                                                      |              |         |                                                       |              |         |
| Urgent surgery                         |                    |              |         |                                                      |              |         |                                                       |              |         |
| Preoperative AV block de novo          | 6.623              | 2.342-18.729 | <0.001  | 8.371                                                | 2.802-25.003 | <0.001  |                                                       |              |         |

Abbreviations: AV: atrioventricular; CABG: coronary artery bypass grafting; CI: confidence interval; CPB: cardiopulmonary bypass; HR: hazard ratio; LV: left ventricle; MV: mitral valve; MR: mitral regurgitation.

**Supplementary Table 4:**

Baseline patient characteristics of all patients included in the late phase analysis (post-landmark, beyond 1 year after surgery).

|                                    | Mitral Valve Repair<br>(n=80) | Mitral Valve<br>Replacement (n=40) | P-Value |
|------------------------------------|-------------------------------|------------------------------------|---------|
| Age (years)                        | 55.5 ± 13.0                   | 60.0 ± 13.1                        | 0.073   |
| Gender (female)                    | 16 (20.0)                     | 19 (47.5)                          | 0.002   |
| Renal impairment                   |                               |                                    |         |
| CC <50 mmol/l                      | 34 (42.5)                     | 20 (50.0)                          | 0.445   |
| Dialysis                           | 2 (2.5)                       | 2 (5.0)                            | 0.600   |
| Hypertension                       | 30 (37.5)                     | 14 (35.0)                          | 0.789   |
| Chronic lung disease               | 6 (7.5)                       | 3 (7.5)                            | 0.999   |
| Diabetes mellitus                  | 5 (6.3)                       | 11 (27.5)                          | 0.001   |
| Symptomatic mitral regurgitation   | 26 (32.5)                     | 12 (30.0)                          | 0.781   |
| Atrial fibrillation                | 12 (15.0)                     | 4 (10)                             | 0.448   |
| Impaired left ventricular function | 17 (21.3)                     | 5 (12.5)                           | 0.243   |
| Previous cardiac surgery           | 16 (20.0)                     | 4 (10.0)                           | 0.166   |
| Peripheral embolism                | 19 (23.8)                     | 12 (30)                            | 0.461   |
| Causative microorganism            |                               |                                    | 0.622   |
| <i>Streptococcus</i> spp.          | 47 (58.8)                     | 23 (57.5)                          |         |
| <i>Staphylococcus Aureus</i>       | 11 (13.8)                     | 7 (17.5)                           |         |
| <i>Staphylococcus</i> spp. (other) | 3 (3.8)                       | 0 (0)                              |         |
| <i>Enterococcus Faecalis</i>       | 8 (10.0)                      | 6 (15.0)                           |         |
| Other or culture negative          | 11 (13.8)                     | 4 (10.0)                           |         |
| Underlying mitral valve disease    | 22 (27.5)                     | 20 (50.0)                          | 0.025   |
| Annular infection                  | 3 (3.8)                       | 8 (20.0)                           | 0.007   |
| Annular calcification              | 4 (5.1)                       | 5 (12.5)                           | 0.270   |
| Concomitant surgery                |                               |                                    |         |
| Aortic valve surgery               | 37 (46.3)                     | 16 (40.0)                          | 0.516   |
| Tricuspid valve surgery            | 15 (18.8)                     | 8 (20.0)                           | 0.870   |
| CABG                               | 8 (10.0)                      | 3 (7.5)                            | 0.750   |
| Aortic cross clamp time (min)      | 192 ± 91                      | 193 ± 118                          | 0.988   |
| Cardiopulmonary bypass time (min)  | 242 ± 120                     | 228 ± 87                           | 0.539   |
| Primary Indication for Surgery     |                               |                                    | 0.130   |
| Heart failure                      | 4 (5.0)                       | 6 (15.0)                           |         |
| Uncontrolled Infection             | 21 (26.3)                     | 8 (20.0)                           |         |
| Prevention of Embolism             | 18 (22.5)                     | 14 (35.0)                          |         |
| Severe Mitral Regurgitation        | 32 (40.0)                     | 11 (27.5)                          |         |
| Severe Aortic Regurgitation        | 5 (6.3)                       | 1 (2.5)                            |         |

Data are presented as n (%) or means ± standard deviations. Abbreviations: CABG: coronary artery bypass surgery; CC: creatinine clearance.
